**Table S1:** Overview of the datasets generated for further analysis

| <b>Dataset</b> | <b>Populations included</b>                                                                                                                                                                       | <b>SNPs</b> | <b>Individuals</b> | <b>Additional Populations DatXa</b>                                                                | <b>SNPs DatXa</b> | <b>Individuals DatXa</b> |
|----------------|---------------------------------------------------------------------------------------------------------------------------------------------------------------------------------------------------|-------------|--------------------|----------------------------------------------------------------------------------------------------|-------------------|--------------------------|
| <b>Dat1</b>    | <input type="checkbox"/> Sudanese<br><input type="checkbox"/> Nzime                                                                                                                               | 3498433     | 247                |                                                                                                    |                   |                          |
| <b>Dat2</b>    | <input type="checkbox"/> 3.5M SNP dataset<br><input type="checkbox"/> Ugandan and Ethiopian AGVP Populations<br><input type="checkbox"/> 1000Genome Project<br><input type="checkbox"/> Egyptians | 1391980     | 701                | <input type="checkbox"/> Mota<br><input type="checkbox"/> LBK<br><input type="checkbox"/> Juhoansi | 140302            | 720                      |
| <b>Dat3</b>    | <input type="checkbox"/> 1.4M SNP-dataset<br><input type="checkbox"/> Ethiopian populations<br><input type="checkbox"/> selected HGDP populations                                                 | 220624      | 916                | <input type="checkbox"/> Mota<br><input type="checkbox"/> LBK<br><input type="checkbox"/> Juhoansi | 20125             | 935                      |
