# Supplementary material for: Northeast African genomic variation shaped by the continuity of indigenous groups and Eurasian migrations
Source: PLOS journal article supplement (doi:10.1371/journal.pgen.1006976), 2017-08-24

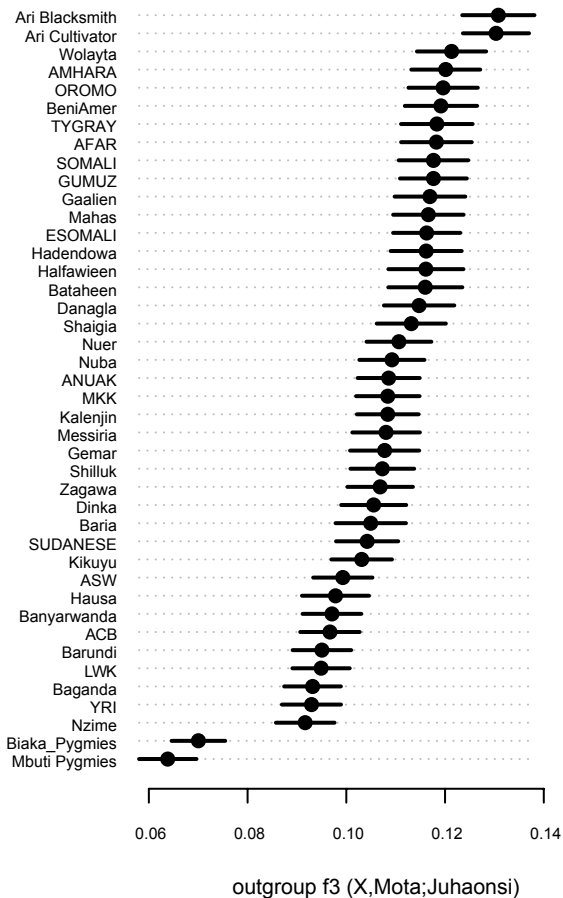

Supplement: S24 (10.1371/journal.pgen.1006976.s024) [file journal.pgen.1006976.s024]
